# Supplementary material
Source: Springer Nature journal article supplement (https://www.springermedizin.de/resource/supplementary/12967_2013_1774_MOESM1_ESM.pdf/9575280)

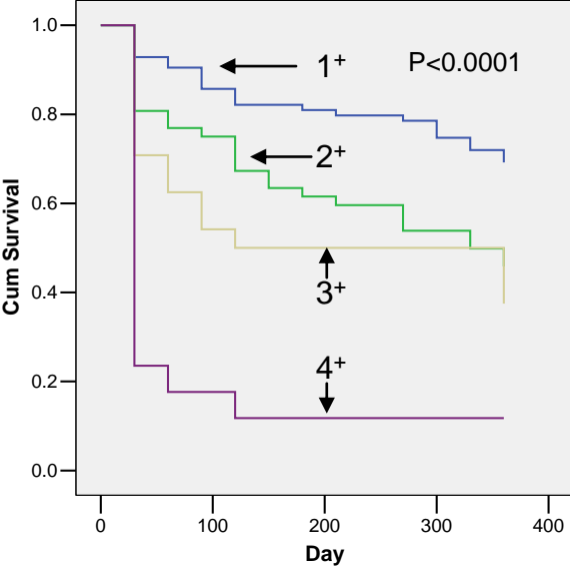

Supplement: MOESM1 [file 9575280]
